# Supplementary material for: From Alnus to Pinus: temperate peatland ecosystem transformation triggered by human-driven landscape change
Source: Copernicus journal article supplement (doi:10.5194/egusphere-2025-3975), 2025-09-08
Supplement: Supplementary file 1 [file egusphere-2025-3975-supplement.pdf]

## ***Supplementary Figures and Tables***

### ***Supplementary Figures***

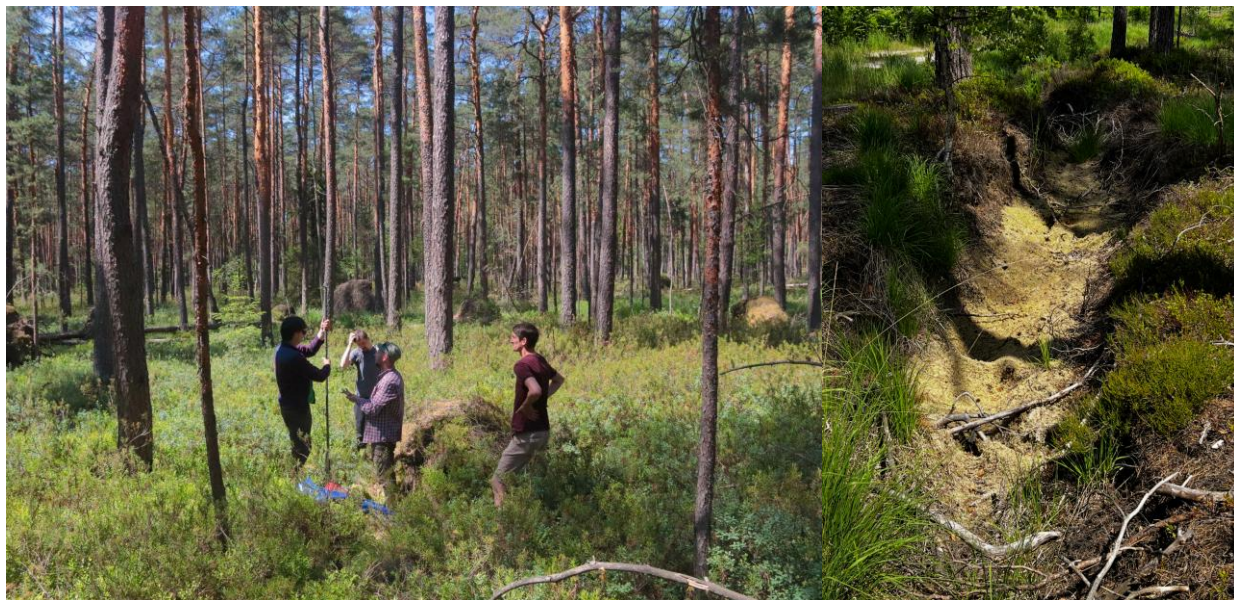

**Figure S1.** Study site in the Wielkie Bagno peatland, Solska Forest, SE Poland: palaeoecological sampling in the Scots pine bog forest (a), one of the existing ditches (b). Photo: Kamil Pilch (a), Michał Słowiński (b).

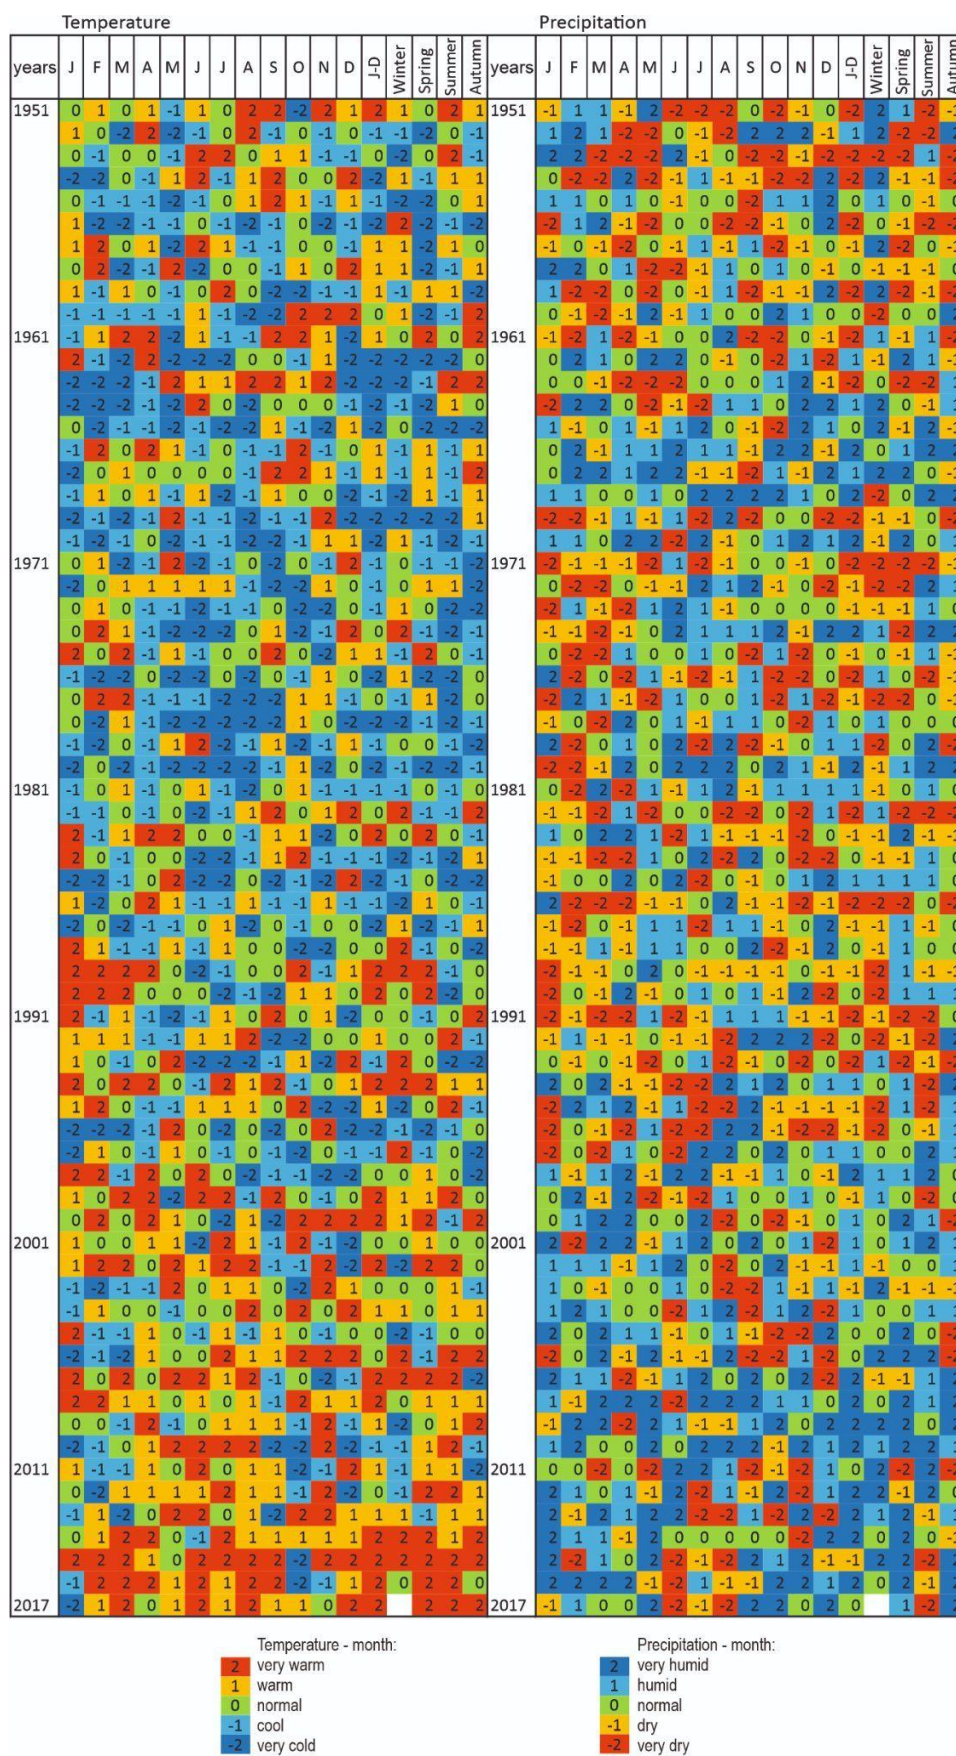

**Figure S2.** Classification of thermal and pluvial conditions in Tomaszów Lubelski in each month (J, F, M, A, M, J, J, A, S, O, N, D), season (Winter, Spring, Summer, Autumn) and year (J–D) in the period 1951–2017.



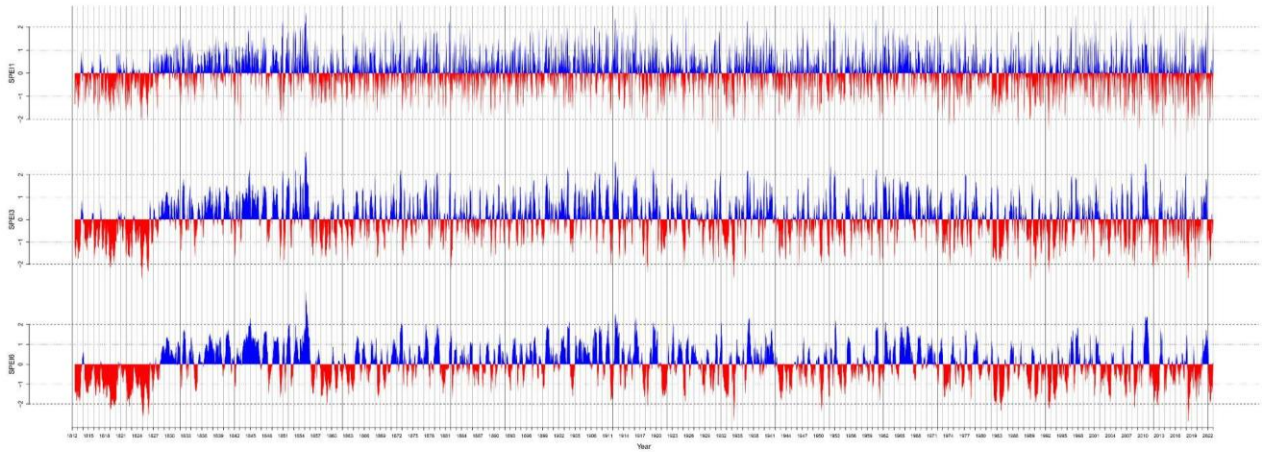

**Figure S3.** Standardized precipitation evapotranspiration index (SPEI) calculated based on the climatic data from Kraków (1812–2022), aggregated over one (SPEI1), three (SPEI3) and six (SPEI6) months. For calculation of the SPEI indices, the water balance was estimated as the difference between precipitation and potential evapotranspiration. Positive value of the index ( $\text{SPEI} > 0$ ) reflects the positive water balance (Vicente-Serrano et al., 2010).

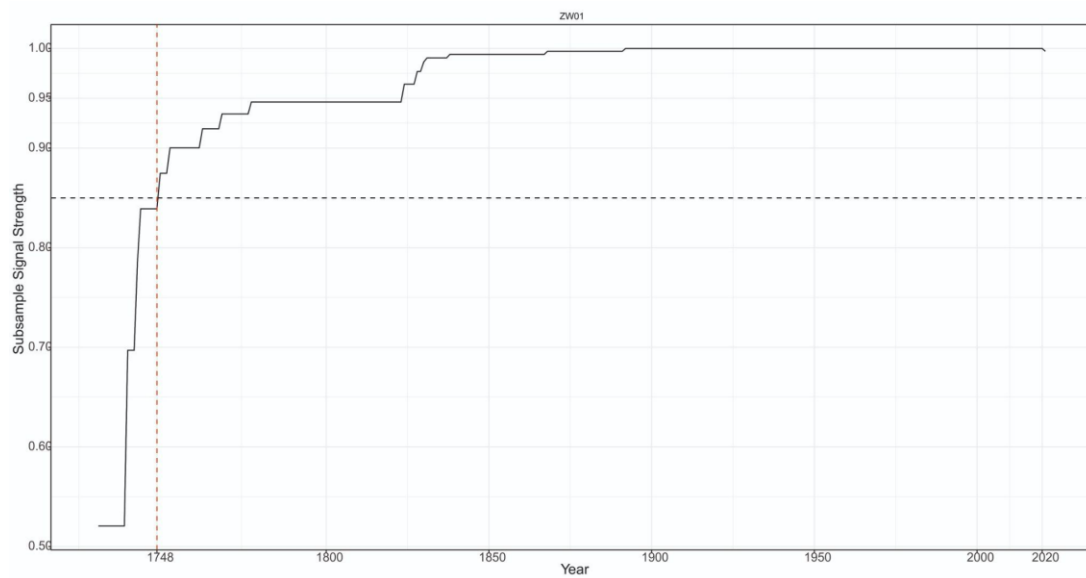

**Figure S4.** Sub-sample signal strength (SSS) of the Scots pine (*Pinus sylvestris* L.) chronology of living peatland trees in Wielkie Bagno, Solska Forest. The vertical dashed line marks the year in which the SSS exceeded the 0.85 threshold.

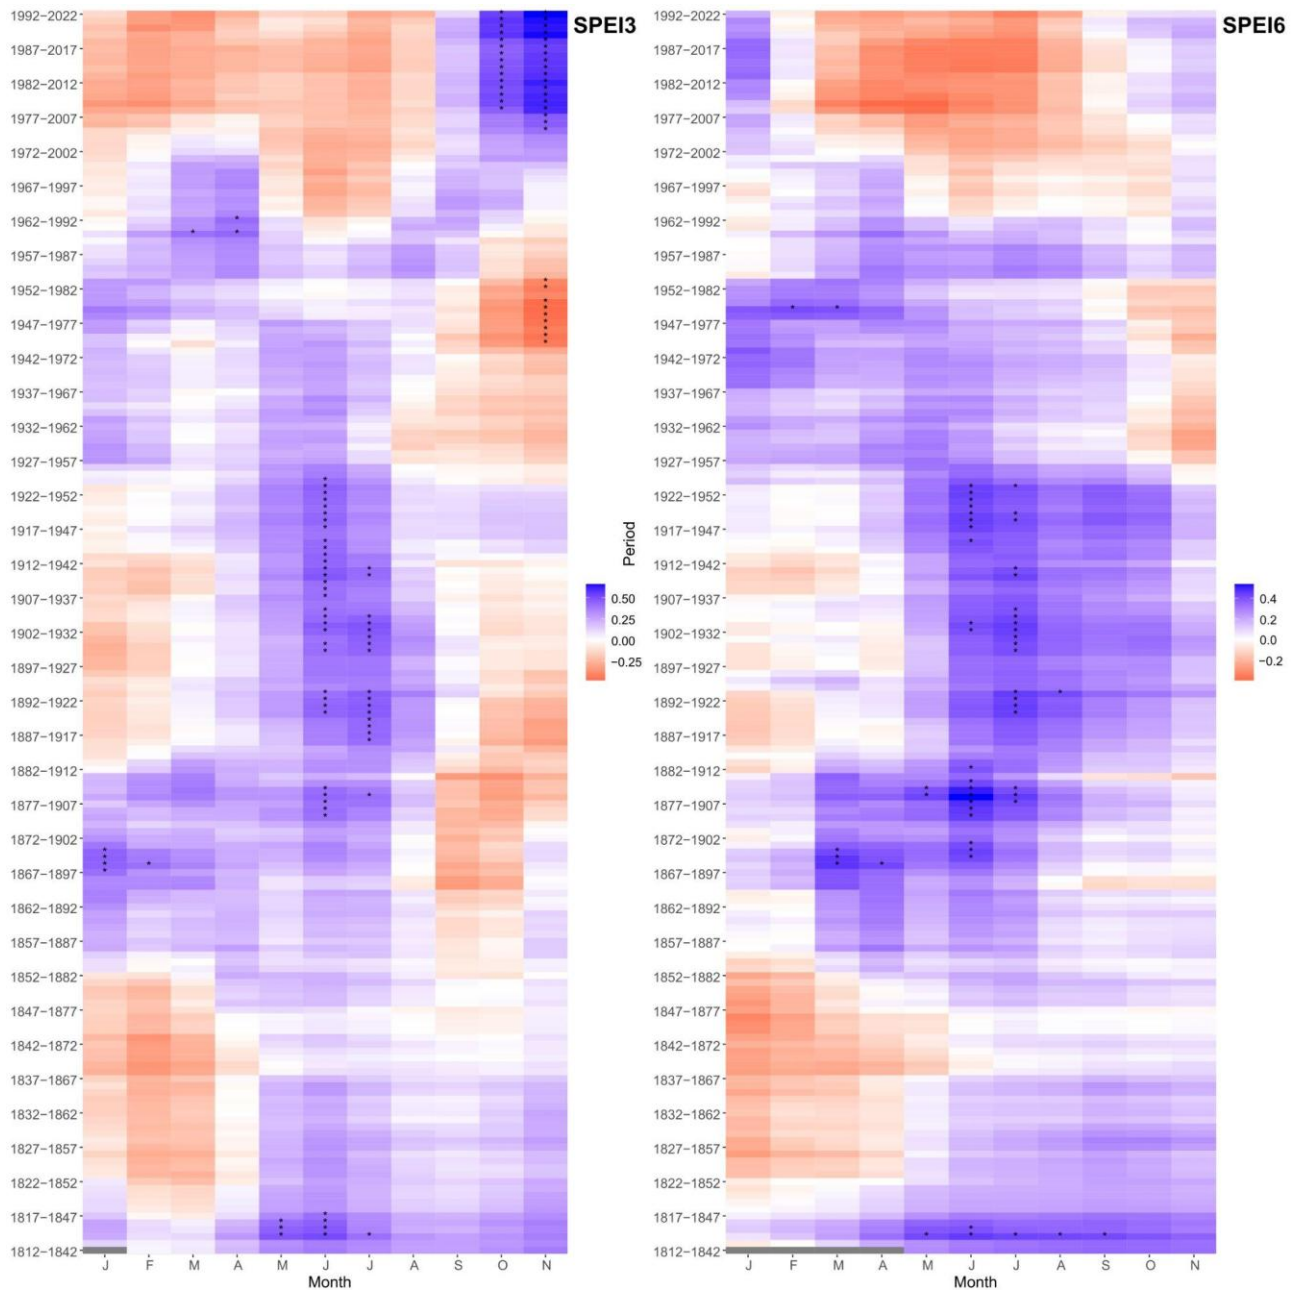

**Figure S5.** Correlation in the 30-year moving window during the period 1812–2022 between indexed tree ring width (RWI) of peatland pines and standardised precipitation evapotranspiration indices aggregated over three (SPEI3) and six (SPEI6) months, calculated for the current year (January–November, J–N). Asterisks (\*) indicate the significant correlations ( $p < 0.05$ ).

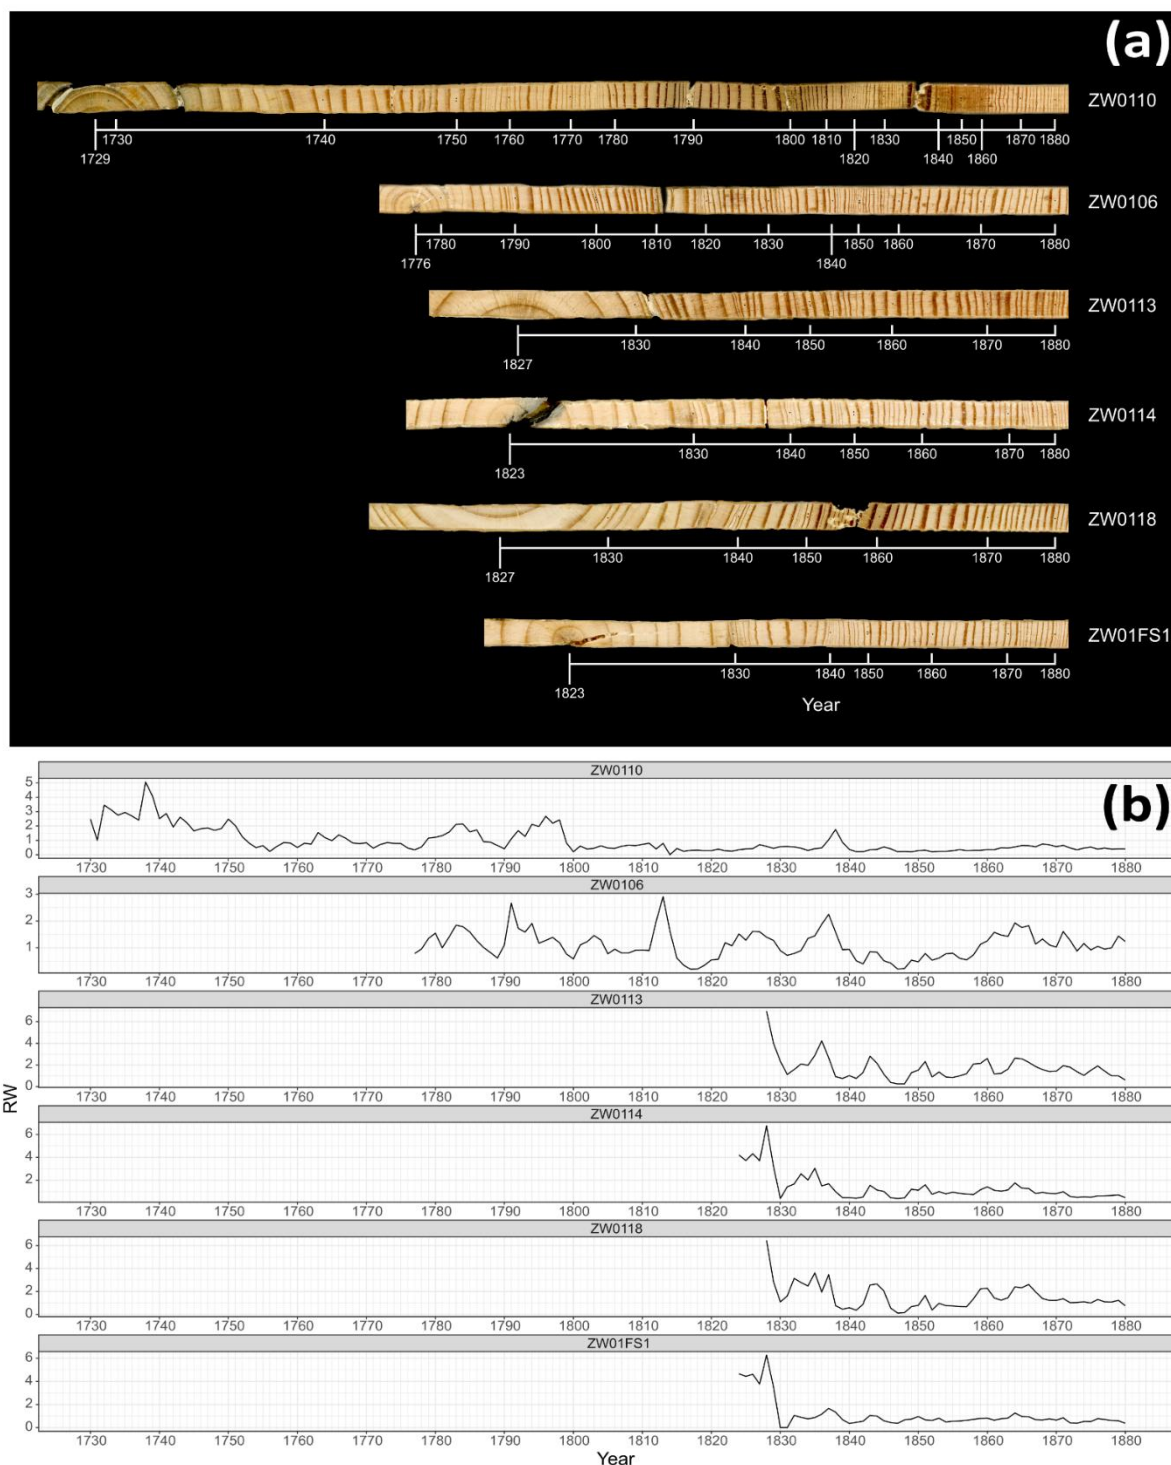

**Figure S6.** Growth rate of selected sample trees of Scots pine (*Pinus sylvestris* L.) from the Wielkie Bagno peatland, Solska Forest, visible in the scans of wood samples (a) and individual growth series (b). The trees presented include individuals belonging to the cohort from the first half of the 19th century (trees: ZW0113, ZW0114, ZW0118, ZW01FS1) as well as older individuals recruited in the 18th century (trees: ZW0110, ZW0106). RW – ring width.

**Table S1.** Comparison of monthly, seasonal and annual mean values of climatic data (temperature: average, minimum and maximum, and precipitation totals) derived from the meteorological stations in Tomaszów Lubelski and Kraków during the overlapping period of measurements from both stations, 1951–2017 (67 years). Tmean – mean air temperature, Tmin – minimum air temperature, Tmax – maximum air temperature, TL – Tomaszów Lubelski, Krk – Kraków, r – Spearman’s rank correlation coefficient (all values significant at  $p = 0.05$ ), p – T-test, Mann-Whitney U Test,  $p > 0.05$  no significant statistical differences between stations.

| Month/Season     | Tmean |      |       |       | Tmin |      |       |       | Tmax |      |       |       | Precipitation |       |       |       |
|------------------|-------|------|-------|-------|------|------|-------|-------|------|------|-------|-------|---------------|-------|-------|-------|
|                  | TL    | Krk  | r     | p     | TL   | Krk  | r     | p     | TL   | Krk  | r     | p     | TL            | Krk   | r     | p     |
| Jan              | -3,9  | -1,4 | 0,950 | 0,000 | -7,2 | -3,9 | 0,943 | 0,000 | -0,8 | 1,3  | 0,928 | 0,000 | 34,3          | 37,2  | 0,700 | 0,479 |
| Feb              | -2,9  | -0,1 | 0,975 | 0,009 | -6,5 | -2,9 | 0,959 | 0,000 | 0,6  | 3,1  | 0,954 | 0,000 | 31,2          | 32,5  | 0,719 | 0,778 |
| March            | 1,1   | 3,8  | 0,962 | 0,000 | -2,9 | 0,4  | 0,970 | 0,000 | 5,6  | 8,1  | 0,934 | 0,026 | 35,7          | 36,7  | 0,700 | 0,702 |
| April            | 7,4   | 9,5  | 0,897 | 0,000 | 2,8  | 5,1  | 0,913 | 0,000 | 12,9 | 14,7 | 0,663 | 0,007 | 41,8          | 47,8  | 0,419 | 0,240 |
| May              | 13,0  | 14,7 | 0,885 | 0,000 | 6,9  | 9,9  | 0,862 | 0,000 | 18,7 | 20,2 | 0,680 | 0,000 | 72,5          | 77,5  | 0,415 | 0,671 |
| June             | 16,3  | 17,9 | 0,835 | 0,000 | 10,3 | 13,3 | 0,808 | 0,000 | 21,8 | 23,2 | 0,547 | 0,004 | 76,6          | 93,9  | 0,295 | 0,012 |
| July             | 17,9  | 19,6 | 0,917 | 0,000 | 11,9 | 15,0 | 0,871 | 0,000 | 23,6 | 25,0 | 0,558 | 0,000 | 94,3          | 94,9  | 0,583 | 0,612 |
| August           | 17,0  | 19,0 | 0,850 | 0,000 | 11,1 | 14,5 | 0,897 | 0,000 | 23,2 | 24,5 | 0,584 | 0,032 | 65,5          | 82,5  | 0,492 | 0,017 |
| September        | 12,4  | 14,5 | 0,887 | 0,000 | 7,4  | 10,6 | 0,927 | 0,000 | 18,3 | 19,5 | 0,606 | 0,002 | 56,7          | 59,2  | 0,711 | 0,996 |
| October          | 7,5   | 9,6  | 0,903 | 0,000 | 3,2  | 6,2  | 0,898 | 0,000 | 12,6 | 13,9 | 0,774 | 0,000 | 46,5          | 44,4  | 0,795 | 0,968 |
| November         | 2,5   | 4,4  | 0,950 | 0,001 | -0,6 | 2,0  | 0,935 | 0,000 | 5,8  | 7,4  | 0,907 | 0,000 | 41,9          | 42,4  | 0,595 | 0,836 |
| December         | -1,7  | 0,5  | 0,952 | 0,002 | -4,7 | -1,8 | 0,935 | 0,000 | 1,1  | 3,0  | 0,940 | 0,019 | 40,1          | 36,6  | 0,528 | 0,208 |
| Spring (Mar-May) | 7,2   | 9,3  | 0,933 | 0,000 | 2,0  | 5,2  | 0,887 | 0,000 | 12,4 | 14,3 | 0,783 | 0,002 | 150,0         | 162,0 | 0,385 | 0,329 |
| Summer (Jun-Aug) | 17,1  | 18,8 | 0,891 | 0,000 | 11,1 | 14,2 | 0,840 | 0,000 | 22,9 | 24,3 | 0,513 | 0,000 | 236,3         | 271,2 | 0,429 | 0,015 |
| Autumn (Sep-Nov) | 7,5   | 9,5  | 0,902 | 0,017 | 3,4  | 6,2  | 0,896 | 0,000 | 12,2 | 13,6 | 0,736 | 0,016 | 145,1         | 146,0 | 0,766 | 0,818 |
| Winter (Dec-Feb) | -2,8  | -0,4 | 0,906 | 0,000 | -6,2 | -2,9 | 0,890 | 0,000 | 0,3  | 2,5  | 0,761 | 0,000 | 105,5         | 106,3 | 0,562 | 0,845 |
| Apr-Sep          | 14,0  | 15,9 | 0,892 | 0,000 | 8,3  | 11,4 | 0,828 | 0,000 | 19,8 | 21,2 | 0,520 | 0,002 | 407,4         | 455,7 | 0,393 | 0,024 |
| Oct-Mar          | 0,4   | 2,8  | 0,953 | 0,000 | -3,1 | 0,0  | 0,937 | 0,000 | 4,2  | 6,1  | 0,924 | 0,000 | 229,6         | 229,8 | 0,718 | 0,876 |
| Year             | 7,2   | 9,3  | 0,906 | 0,000 | 2,6  | 5,7  | 0,890 | 0,000 | 12,0 | 13,7 | 0,761 | 0,000 | 637,0         | 685,5 | 0,562 | 0,113 |

**Table S2.** Number of archival sources with information on Wielkie Bagno and its surroundings that were used in the study, out of a total of 161 sources.

| Number of archival sources<br>with qualitative and/or quantitative information on |  | Total |
|-----------------------------------------------------------------------------------|--|-------|
| Forest structure                                                                  |  | 45    |
| Land use/economy                                                                  |  | 109   |
| Demography                                                                        |  | 47    |
| Settlement structure                                                              |  | 77    |
| Drainage                                                                          |  | 21    |
| Forest management                                                                 |  | 44    |
| Timber harvesting                                                                 |  | 33    |

**Table S3.** Amount of rent paid by forest settlers in the 2nd half of the 18th century in the Tereszpól area. Source: State Archives in Lublin (APL), AOZ, sign. 1538–1539.

| <b>Year</b> | <b>The amount of rent (in złoty)<br/>from fields and meadows near<br/>Tereszpól</b> | <b>Source</b>                     |
|-------------|-------------------------------------------------------------------------------------|-----------------------------------|
| 1757        | 2399                                                                                | APL, AOZ, sign. 1538, k. 579–586  |
| 1760        | 2727                                                                                | APL, AOZ, sign. 1538, k. 710–720  |
| 1762        | 2973                                                                                | APL, AOZ, sign. 1539, k. 16–20A   |
| 1765        | 3241                                                                                | APL, AOZ, sign. 1539, k. 134–145  |
| 1771        | 3365                                                                                | APL, AOZ, sign. 1539, k. 410–419A |
| 1775        | 3644                                                                                | APL, AOZ, sign. 1539, k. 597–607  |

**Table S4.** Number of hutters in the 2nd half of the 18th century and in the early 19th century in the Zwierzyniec Key of the Zamoyski Family Estate (1759–1767) and the vicinity of the Tereszpól village (1789–1802), including direct surroundings of our study site (Wielkie Bagno peatland). Source: State Archives in Lublin (APL), AOZ, sign. 163, 732, 1538–1539, 2637.

| <b>Year</b>                                     | <b>Number of hutters</b> | <b>Source</b>                |
|-------------------------------------------------|--------------------------|------------------------------|
| <i>in the Zwierzyniec Key</i>                   |                          |                              |
| 1759                                            | 42                       | APL, AOZ, sign. 1538, p. 652 |
| 1765                                            | 45                       | APL, AOZ, sign. 1539, p. 120 |
| 1767                                            | 47                       | APL, AOZ, sign. 1539, p. 244 |
| <i>in the vicinity of the Tereszpól village</i> |                          |                              |
| 1789                                            | 43                       | APL, AOZ, sign. 163, p. 15   |
| 1792                                            | 50                       | APL, AOZ, sign. 732, p. 41   |
| 1802                                            | 29                       | APL, AOZ, sign. 2637, p. 28  |
