# Supplementary material for: From Alnus to Pinus: temperate peatland ecosystem transformation triggered by human-driven landscape change
Source: Copernicus journal article supplement (doi:10.5194/egusphere-2025-3975), 2025-09-08
Supplement: Supplementary file [file egusphere-2025-3975-AC2-supplement.pdf]

## Reply on RC2 – Supplementary Figures (SFs)

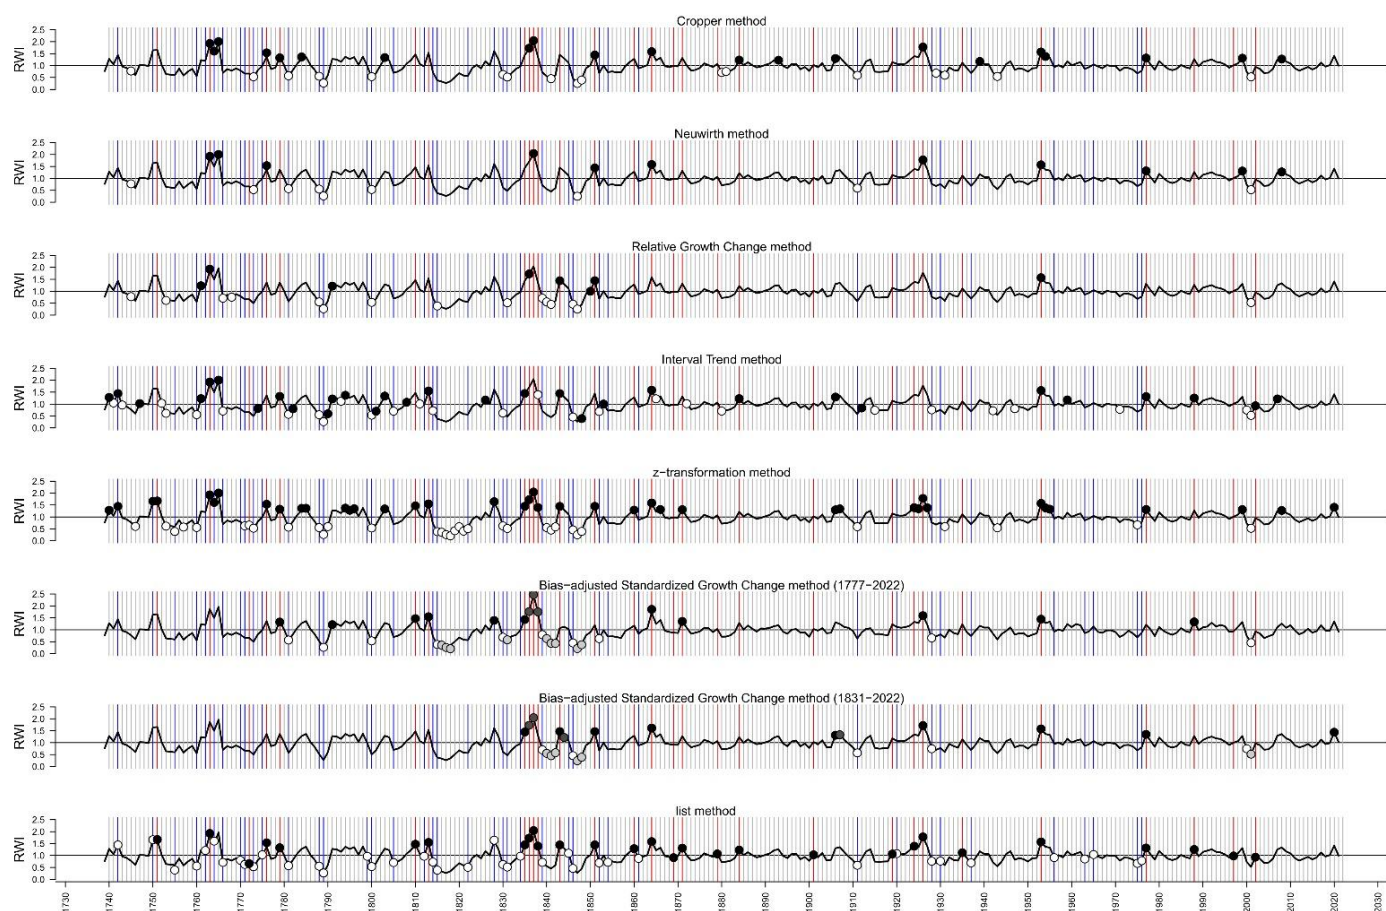

Fig. SF1. Pointer years of Scots pine determined by different methods: Normalisation in a moving window (Cropper, Neuwirth), Relative Growth Change, Interval Trend, Z-transformation, Bias-adjusted Standardised Growth Change (for two periods: 1777–2020 and 1831–2020) (van der Maaten-Theunissen et al., 2015, 2021; Buras et al., 2020, 2022), and the list method (Yamaguchi, 1991). The following parameters were applied: for Cropper and Neuwirth, a 13-year moving window was used to calculate local growth deviations, with a series threshold requiring 75% of trees to exhibit an event year; Neuwirth further applied thresholds of 1, 1.28, and 1.645 to identify weak, strong, and extreme events. Relative Growth Change (RGC) was determined by comparing each year to the 4 preceding years, defining a pointer year when at least 75% of trees showed a growth change exceeding +60% or -40%. The Interval Trend method identified years where a minimum of 95% of trees displayed a consistent upward or downward growth trend, while Z-transformation defined pointer years based on a standard deviation (z-score) threshold of 1. Black (white) circles denote positive (negative) pointer years determined by the respective method. Red (blue) lines denote all positive (negative) pointer years determined by different methods.

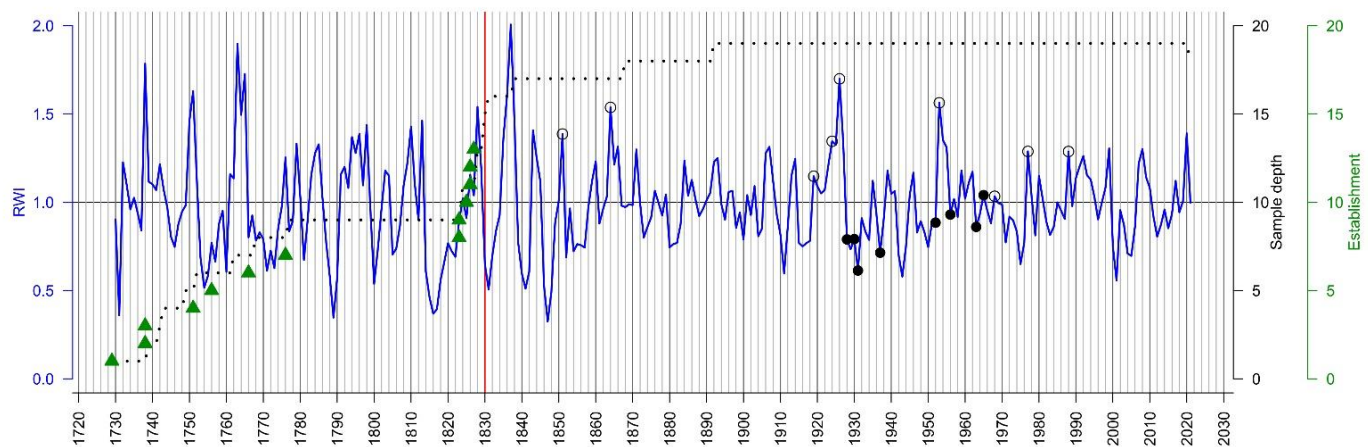

Fig. SF2. Scots pine (*Pinus sylvestris* L.) chronology (blue line), selected pointer years aligning with regional data (Cedro and Lamentowicz, 2008; Dauškane et al., 2011; Edvardsson et al., 2015, 2019) (circles), and tree recruitment dates (green triangles) of living peatland trees in Wielkie Bagno, Solska Forest. RWI – ring width index. Sample depth is denoted by a dotted line, fire date recorded in the tree ring material by red vertical line, and positive (negative) pointer years by open black (filled black) circles.

## References:

- Buras, A., Rammig, A., and Zang, C. S.: A novel approach for the identification of pointer years, *Dendrochronologia*, 63, 125746, 10.1016/j.dendro.2020.125746, 2020.
- Buras, A., Ovenden, T., Rammig, A., and Zang, C. S.: Refining the standardized growth change method for pointer year detection: Accounting for statistical bias and estimating the deflection period, *Dendrochronologia*, 74, 125964, 10.1016/j.dendro.2022.125964, 2022.
- Cedro, A. and Lamentowicz, M.: The last hundred years' dendroecology of Scots pine (*Pinus sylvestris* L.) on a Baltic bog in Northern Poland: Human impact and hydrological changes, *Baltic Forestry*, 14, 26–33, 2008.
- Dauškane, I., Brūmelis, G., and Elferts, D.: Effect of climate on extreme radial growth of Scots pine growing on bogs in Latvia, *Estonian Journal of Ecology*, 60, 236–248, 10.3176/eco.2011.3.06, 2011.
- Edvardsson, J., Rimkus, E., Corona, C., Šimanauskienė, R., Kažys, J., and Stoffel, M.: Exploring the impact of regional climate and local hydrology on *Pinus sylvestris* L. growth variability – A comparison between pine populations growing on peat soils and mineral soils in Lithuania, *Plant and Soil*, 392, 345–356, 10.1007/s11104-015-2466-9, 2015.
- Edvardsson, J., Baužienė, I., Lamentowicz, M., Šimanauskienė, R., Tamkevičiūtė, M., Taminskas, J., Linkevičienė, R., Skuratovič, Ž., Corona, C., and Stoffel, M.: A multi-proxy reconstruction of moisture dynamics in a peatland ecosystem: A case study from Čepkeliai, Lithuania, *Ecol. Indic.*, 106, 105484, 10.1016/j.ecolind.2019.105484, 2019.
- van der Maaten-Theunissen, M., van der Maaten, E., and Bouriaud, O.: pointRes: an R package to analyze pointer years and components of resilience, *Dendrochronologia*, 35, 34–38, 10.1016/j.dendro.2015.05.006, 2015.
- van der Maaten-Theunissen, M., Trouillier, M., Schwarz, J., Skiadaresis, G., Thurm, E. A., and van der Maaten, E.: pointRes 2.0: New functions to describe tree resilience, *Dendrochronologia*, 70, 125899, 10.1016/j.dendro.2021.125899, 2021.
- Yamaguchi, D. K.: A Simple Method for Cross-Dating Increment Cores from Living Trees, *Canadian Journal of Forest Research*, 21, 414–416, 10.1139/X91-053, 1991.
